# Supplementary material for: An enantio- and stereocontrolled synthesis of (–)-mycestericin E via cinchona alkaloid-catalyzed asymmetric Baylis–Hillman reaction
Source: Royal Society of Chemistry journal article supplement (doi:10.1039/b106471c), 2001-01-01
Supplement: b106471c.doc [file b106471c.doc]

# An enantio- and stereocontrolled synthesis of (–)-mycestericin E via *cinchona* alkaloid-catalyzed asymmetric Baylis-Hillman reaction

Yoshiharu Iwabuchi, Mariko Furukawa, Tomoyuki Esumi, and Susumi Hatakeyama*

*Faculty of Pharmaceutical Sciences,*

*Nagasaki University, Nagasaki 852-8521, Japan*

### Supporting Information

**General Remarks.** Unless otherwise stated, all reactions were carried out under argon atmosphere. All solvents were dried and distilled by standard procedures. 1,1,1,3,3,3-Hexafluoroisopropyl acrylate was obtained from Tokyo Chemical Industry (Tokyo Kasei) Co. Ltd. and used without purification. (3*R*, 8*R*, 9*S*)-10,11-Dihydro-3, 9-epoxy-6’-hydroxy-cinchonane (**7**) was prepared from quinidine in one step as previously repoted 1. Organic extracts were dried over anhydrous MgSO4, filtered through Celite, and concentrated under reduced pressure with the aid of a rotary evporator. Flash chromatography was performed using Merck 60 (230-400 mesh) or Cica 60 (spherical/40-50 m) silica gel. Reaction mixture and chromatography fractions were analysed by TLC using precoated silica gel 60 F254 plates (Merck). Compounds were visualised under ultraviolet lamp (254 nm) and/or by staining with p-anisaldehyde (in H2SO4-AcOH-EtOH), phosphomolybdic acid (in EtOH).

Infra red spectra were measured on a JASCO FT/IR -230 spectrometer and optical rotations were recorded on a JASCO DIP-370 polarimeter at ambient temperature. 1H and 13C NMR spectra were measured on a Varian Gemini 300 or a Varian Unity plus 500 spectrometer. Chemical shifts are reported as parts per million (ppm) downfield from tetramethylsilane (TMS) in  units, and coupling constants are given in hertz. TMS was defined as 0 ppm for 1H NMR spectra and the center line of the triplet of CDCl3 was also defined as 77.10 ppm for 13C NMR spectra. Mass spectra were measured on a JEOL JMS-DX303.

**2-hexyl-2-(6-iodo-hexyl)-[1,3]dithiane**

To a solution of 2-hexyl-[1,3]dithiane 2 (5.0 g, 24.5 mmol) in THF (100 mL) was added *n*-BuLi (1.61M in hexane, 17.0 mL, 27.0 mmol) at –20 °C. After 2.5 hr of stirring, the mixture was transferred to a solution of 1,6-diiodohexane (9.13 g, 27.4 mmol) in THF (150 mL) at –30 °C via cannula and the resulting mixture was stirred for 11 hr at the same temperature. The reaction was quenched with MeOH and diluted with Et2O. The mixture was washed with H2O and brine, dried, and concentrated. The residue was purified by flush chromatography {silica gel, Et2O-hexane (1:100)} to afford 2-hexyl-2-(6-iodo-hexyl)-[1,3]dithiane (8.17 g, 81%) as a colorless oil. FT-IR (neat)  2933, 2854, 1460, 1421, 1375, 1273, 1234, 1200, 1167, 906, 725 cm-1; 1H NMR (300 MHz, CDCl3)  3.17 (t, *J =* 6.9Hz, 2H), 2.79 (t, *J =* 5.7Hz, 4H), 1.97-1,89 (m, 2H), 1.86-1.77 (m, 6H), 1.46-1.24 (m, 14H), 0.89 (t, *J =* 6.9Hz, 3H) ppm; 13C NMR (75 MHz, CDCl3)  53.3, 38.2, 38.1, 33.5, 31.7, 30.4, 29.5, 28.7, 26.0, 25.6, 24.1, 23.9, 22.7, 14.1, 7.2 ppm; HRMS (EI) calcd for C16H31S2I: 414.0912, found: 414.0916.

**11-(2-Hexyl-[1,3]dithian-2-yl)-1-(*tert*-butyldimethylsiloxy)undec-4-yne** **(3)**

To a solution of 5-(*tert*-butyldimethylsiloxy)-1-pentyne (195 mg, 0.98 mmol) in THF (5 mL) was added *n*-BuLi (1.5 M in hexane, 0.7 mL, 1.07 mmol) at –78 °C and then allowed to warm up to –20°C. After 2 hr of stirring, the mixture was cooled to –78 °C and hexamethylphosphoric triamide (0.2 mL, 1.07 mmol) was added. The resulting mixture transferred to a solution of **2** (338 mg, 0.82 mmol) in THF (5 mL) at –78 °C via cannula and then warmed to room temperature and stirred for 2.5 hr. The reaction was quenched with saturated NH4Cl at 0 °C, and the mixture wasextracted with Et2O. The ethereal layer was washed with saturated NaHCO3 and brine, dried, and concentrated. The residue was purified by flush chromatography {silica gel, Et2O-hexane (1:100)} to afford **3** (343 mg, 87%) as a colorless oil. FT-IR (neat)  2943, 2858, 1460, 1252, 1105, 968, 839, 777 cm-1; 1H NMR (300 MHz, CDCl3)  3.69 (t, *J =* 6.0Hz, 2H), 2.80 (br t, *J =* 6.0Hz, 4H), 2.22 (tt, *J =* 2.4, 7.2Hz, 2H), 2.14 (tt, *J =* 2.4, 6.9Hz, 2H), 1.99-1.91 (m, 2H), 1.88-1.83 (m, 4H), 1.68 (quint, *J =* 6.6Hz, 2H), 1.50-1.25 (m, 16H), 0.89 (s, 9H), 0.88 (t, *J =* 6.9Hz, 3H), 0.05 (s, 6H) ppm; 13C NMR (75 MHz, CDCl3)  79.9, 79.5, 61.4, 53.0, 37.9, 37.8, 31.8, 31.4, 29.2, 29.1, 28.7, 28.4, 25.7, 25.6, 25.3, 23.7, 22.3, 18.4, 14.8, 13.8, -5.7 ppm; HRMS (EI) calcd for C27H52OS2Si: 484.3229, found: 484.3261.

**18-Hydroxy-octadec-14-yn-7-one** **(4)**

A mixture of dithiane **3** (3.82 g, 7.89 mmol), MeI (10.0 mL, 156 mmol), Na2CO3 (1.26 g, 16.6 mmol), H2O (6 mL), MeCN (20 mL) and THF (40 mL) was heated at 70 °C in a sealed tube for 43 hr. After cooling, the mixture was diluted with CH2Cl2 and washed with 5% Na2S2O3 and brine, dried, and concentrated. The residue was purified by column chromatography {silica gel, AcOEt-hexane (1:3)} to afford ketone **4** (2.01 g, 91%) as a white solid. mp. 42 °C. FT-IR (neat)  3161, 2925, 2858, 1703, 1460, 1414, 1055, 912, 729 cm-1; 1H NMR (300 MHz, CDCl3)  3.76 (t, *J =* 6.3Hz, 2H), 2.38 (dt, *J =* 1.8, 7.5Hz, 4H), 2.27 (tt, *J =* 2.4, 6.6Hz, 2H), 2.13 (tt, *J =* 2.4, 6.9Hz, 2H), 1.73 (quint, *J =* 6.6Hz, 2H), 1.68 (br, 1H), 1.62-1.22 (m, 16H), 0.88 (t, *J =* 6.9Hz, 3H) ppm; 13C NMR (75 MHz, CDCl3)  211.8, 81.0, 79.5, 62.1, 42.9, 42.8, 31.7, 31.6, 29.0, 28.9, 28.8, 28.7, 23.9, 23.8, 22.6, 18.7, 15.5, 14.1 ppm; HRMS (EI) calcd for C18H32O2: 280.2402, found: 280.2418.

**11-(2-Hexyl-[1,3]dioxolan-2-yl)-undec-4-yn-1-ol (5)**

A mixture of ketone **4** (104 mg, 0.37 mmol), ethylene glycol (31 L, 0.56 mmol), *p*-TsOH·H2O (3.6 mg, 0.019 mmol) in benzene (4 mL) was refluxed using a Dean-Stark trap. After 18 hr, the reaction mixture was quenched with saturated aqueous NaHCO3 at 0 °C and diluted with Et2O. The organic layer was separated and washed with brine, dried, and concentrated. The residue was purified by column chromatography {silica gel, AcOEt-hexane (1:3)} to afford ketal **5** (118 mg, 98%) as a colorless oil. FT-IR (neat)  3415, 2931, 2860, 2679, 2202, 1458, 1308 1163, 1065, 943, 768 cm-1;1H NMR (300 MHz, CDCl3)  3.93 (s, 4H), 376 (q, *J =* 6.0Hz, 2H), 2.28(tt, *J =* 6.9, 2.4Hz, 2H) 2.14 (tt, *J =* 6.9, 2.4Hz, 2H), 1.74 (quint, *J =* 6.6Hz, 2H), 1.70 (br, 1H), 1.62-1.56 (m, 4H) 1.52-1.28 (m, 16H), 0.88 (t, *J =* 6.9Hz, 3H) ppm; 13C NMR (75 MHz, CDCl3)  112.0, 81.1, 79.4, 65.0, 62.1, 37.2, 37.1, 31.9, 31.6, 29.7, 29.4, 29.0, 28.8, 23.9, 23.8, 22.7, 18.7, 15.5, 14.1 ppm; HRMS (EI) calcd for C20H36O3: 324.2664, found: 324.2657.

**(*E*)-11-(2-Hexyl-[1,3]dioxolan-2-yl)-undec-4-en-ol**

A mixure of THF (6 mL), diglyme (54 mL), and LiAlH4 (3.23 g, 85.1 mmol) was heated at 130 °C and a low boiling fraction was distilled off using a Dean-Stark trap. A solution of alkynol **4** (7.89 g, 24.3 mmol) in diglyme (10mL) was slowly added to the stirred mixture at 0 °C. Then temperature was raised and kept at 130 °C for 13 hr. The reaction mixture was cooled and slowly quenched with ice-cold water. The resulting slurry was filtered through a pad of Celite and the remaining solid was extensively washed with CH2Cl2. The combined filtrate was washed with brine, dried, and concentrated. The residue was purified by flush chromatography {silica gel, AcOEt-hexane (1:3)} to afford (*E*)-11-(2-Hexyl-[1,3]dioxolan-2-yl)-undec-4-en-ol (6.9 g, 87%) as a colorless oil. FT-IR (neat)  3346, 2927, 2858, 2216, 1460, 1211, 1072, 966 cm-1; 1H NMR (300 MHz, CDCl3)  5.45-5,40 (m, 2H), 3.92 (s, 4H), 3.65 (dd, *J =* 11.7, 6.3Hz, 2H), 2.08 (dt, *J =* 6.6, 6.3Hz, 2H), 1.97 (dt, *J =* 6.3, 5.7Hz, 2H), 1.63 (t, *J =* 7.5Hz, 2H), 1.58 (t, *J =* 6.6Hz, 2H), 1.33-1.28 (m, 18H), 0.88 (t, *J =* 6.6Hz, 3H ) ppm; 13C NMR (75 MHz, CDCl3)  131.3, 129.5, 112.0, 64.9, 62.6, 37.2, 32.6, 32.5, 31.9, 29.8, 29.7, 29.5, 29.1, 29.0, 23.9, 22.7 ppm; HRMS (EI) calcd for C20H38O3: 326.2821, found: 326.2834.

**(*E*)-11-(2-Hexyl-[1,3]dioxolan-2-yl)-undec-4-enal** **(6)**

Dimethyl sulfoxide (8.0 mL, 134 mmol) was added dropwise to a solution of oxalyl chloride (5.0 mL, 56.67 mmol) in CH2Cl2 (90 mL) at –78 °C, and the resulting mixture was stirred at the same temperature for 15 min. To this solution was added dropwise via cannula a solution of **5** (6.91 g, 21.6 mmol) in CH2Cl2 (10 mL), and the mixture was stirred at –78°C for 30 min. Et3N (24 mL, 171 mmol) was added at –78°C, and the mixture was allowed to warm to ice-bath temperature. After 30 min, saturated aqueous NH4Cl was added, and then diluted with Et2O. The organic layer was separated, washed with brine, dried, and concentrated. The residue was purified by flush chromatography {silica gel, AcOEt-hexane (1:5)} to afford aldehyde **6** (6.9 g, 100%) as a colorless oil. FT-IR (neat) n 3541, 2929, 2860, 1718, 1456, 1078, 964 cm-1; 1H NMR (300 MHz, CDCl3) d 9.76 (t, J = 2.1Hz, 1H), 5.44 (dt, J = 15.6, 3.6Hz, 1H), 5.42 (dt, J = 15.3, 4.5), Hz, 1H), 3.93 (s, 4H), 2.49 (tt, J = 6.9, 1.5Hz, 2H), 2.33 (dt, J = 6.9, 6.3Hz, 2H), 1.97 (dt, J = 6.9, 6.0Hz, 2H), 1.61-1.56 (m, 8H), 1.28 (m, 12H), 0.88 (t, J = 6.9Hz, 3H ) ppm; 13C NMR (75 MHz, CDCl3) d 202.6, 132.1, 127.7, 112.0, 65.0, 43.6, 37.2, 32.5, 31.9, 29.9, 29.7, 29.4, 29.2, 25.3, 23.9, 22.7, 14.2 ppm, HRMS (EI) calcd for C20H35O3: 324.2664, found: 324.2658.

**(*R,E*)-13-(2-Hexyl-[1,3]dioxolan-2-yl)-3-hydroxy-2-methylene-tridec-6-enoic acid 1,1,1,3,3,3-hexafluoroisopropyl ester** **(8)**

***(2RS,6S,E)-*2,6-Bis-[10’-(2”-hexyl-[1,3]dioxolan-2”-yl)-dec-3-enyl]-5-methylene-[1,3]dioxan-4-one (9)**

To a solution of amine catalyst **7** (415 mg, 1.34 mmol) in DMF (7 mL) was added a solution of aldehyde **6** (2.17 g, 6.69 mmol) in CH2Cl2 (7 mL), and the resulting solution was cooled to –55°C. To this solution was added 1,1,1,3,3,3-hexafluoroisopropyl acrylate (1.65 mL, 2.01 mmol), and the mixture was stirred overnight. The reaction mixture was quenched with 0.5 N HCl and extracted with Et2O. The ethereal extract was washed with saturated aqueous NaHCO3 and brine, dried, and concentrated. The residue was purified by flush chromatography {silica gel, AcOEt-hexane (1:8)} to give **5** (213 mg, 10%), ester **8** (1.54 g, 47% based on consumed aldehyde **6**), and dioxanone **9** (575 mg, 14% based on consumed aldehyde **6**). Data for ester **8** (> 97% ee, determined by HPLC analysis of the corresponding methyl ester **10** using a chiral column; HPLC conditions: Daicel Chiralcel OD-H, 2-propanol : hexane = 1:50 (0.5 mL/min), tR = 24.0 min (*R*) and 27.1 min (*S*).): colorless oil, []D27 +6.94 (*c* 0.72, CHCl3); FT-IR (neat)  3464, 2933, 2861.84, 1753, 1631, 1456, 1380, 1227, 1115, 964, 918, 806 cm-1; 1H NMR (300 MHz, CDCl3)  6.48 (s 1H) 6.15 (s, 1H) 5.85 (sept, *J* = 6.0Hz, 1H), 5.44 (dt, J = 16.5, 4.2Hz, 1H), 5.42 (dt, J = 16.5, 4.2Hz, 1H), 3.62 (s, 4H), 2.14 (dt, *J* = 11.7, 6.0Hz, 2H), 1.97 (q, *J =* 6.3, 2H), 1.79-1.55 (m, 6H), 1.42-1.53 (m, 16H), 0.88 (t, *J =* 6.9Hz, 3H ) ppm; 13C NMR (75 MHz, CDCl3)  162.7, 140.7, 132.0, 129.0, 128.9, 120.5 (q, *J =* 281.18Hz), 112.0, 70.2, 66.7 (sept, *J* = 35.25), 37.2, 36.1, 32.6, 31.9, 29.8, 29.7, 29.5, 29.2, 29.1, 28.9, 23.9, 23.8, 22.7, 14.2 ppm; HRMS (EI) calcd for C26H40O5F6: 546.2780, found: 546.2781.

Data for dioxanone **9** (20% ee, determined by HPLC analysis of the corresponding methyl ester **10** using a chiral column as described for ester **8**):: colorless oil, []D25 –2.70 (*c* 1.11, CHCl3); FT-IR (neat)  3519, 2927, 2858, 1738, 1464, 1279, 1041, 966 cm-1; 1H NMR (300 MHz, CDCl3)  6.48 (d *J* = 2.1, 1H) 5.60 (d, *J* = 1.5Hz, 1H), 5.51-5.35 (m, 4H), 5.23 (t, *J* = 5.1Hz, 1H), 4.52 (br, 1H) 3.94 (s, 8H), 2.17 (dt, *J* = 12.9, 6.0Hz, 4H), 1.99-1.97 (m, 4H), 1.89-1.75 (m, 4H), 1.61-1.56 (m, 8H), 1.28 (m, 32H), 0.88 (t, *J =* 6.9Hz, 6H ) ppm; 13C NMR (75 MHz, CDCl3)  164.0, 137.2, 132.0, 131.9, 128.5, 128.2, 125.4, 111.9, 101.6, 76.9, 65.0, 37.2, 34.9, 34.3, 32.6, 31.9, 29.9, 29.7, 29.7, 29.5, 29.2, 27.7, 26.3, 23.9, 22.7, 14.2 ppm; HRMS (EI) calcd for C43H74O7: 703.5435, found: 703.5418.

(*R, E*)-13-(2-Hexyl-[1,3]dioxolan-2-yl)-3-hydroxy-2-methylene-tridec-6-enoic acid methyl ester (10)

A mixture of hexafluoroisopropyl ester **8** (3.35 g, 6.13 mmol) and NaOMe (66.2 mg, 1.23 mmol) in MeOH (6.5 mL) was stirred at room temperature for 1.5 hr. Dowex 50 (H+ form, 500 mg) was added, and the mixture was filtered through a glass filter. The filtrate was concentrated and chromatographed{silica gel, AcOEt-hexane (1:4)} to give methyl ester **10** (2.39 g, 95%) as a colorless oil. []D24 +9.0 (*c* 1.00, CHCl3); FT-IR (neat)  3741, 2931, 2860, 1719, 1631, 1444, 1282, 1200, 1151, 1078, 958 cm-1; 1H NMR (300 MHz, CDCl3)  6.23 (s 1H) 5.80 (s, 1H) 5.43 (dt, J = 10.5, 2.4Hz, 1H), 5.41 (dt, J = 10.8, 2.7Hz, 1H), 4.40 (t, *J* = 6.6Hz, 1H), 3.92 (s, 4H), 3.78 (s, 3H), 2.11 (dt, *J* = 6.9, 13.8Hz, 2H), 1.91 (q, *J =* 5.7, 2H), 1.75-1.66 (m, 2H), 1.66-1.55 (m, 4H), 1.29-1.28 (m, 16H), 0.88 (t, *J =* 7.2Hz, 3H ) ppm; 13C NMR (75 MHz, CDCl3)  167.0, 142.4, 131.5, 129.2, 125.2, 12.0, 71.4, 64.9, 52.0, 37.2, 36.0, 32.6, 31.9, 29.8, 29.7, 29.5, 29.2, 29.0, 23.9, 22.7, 14.2; ppm HRMS (EI) calcd for C24H42O5: 410.3032, found: 410.3014.

**(2*S*, 3*R*, *E*)-1,2-epoxy-13-(2’-Hexyl-[1,3]dioxolan-2’-yl)-3-hydroxy-2-methoxycarbonyl-tridec-1,6-diene (11)**

To a stirred suspension of **10** (608 mg, 1.48 mmol) and 4A molecular sieves (powdered and activated, 888 mg) in CH2Cl2 (5 mL) was added TBHP (3.04 M in CH2Cl2, 1.9 mL) at –20°C. The resulting mixture was stirred for 26 hr at –30 to –20°C. The reaction was quenched by adding a mixture of acetone (5 mL) and H2O (1mL), and the reaction mixture was warm to room temperature. The resulting slurry was filtered through a pad of Celite and the remaining solid was extensively washed with CH2Cl2. The combined filtrate was washed with brine, dried, and concentrated. The residue was purified by flush chromatography {silica gel, AcOEt-hexane (1:3)} to afford **11** (463 mg, 73%) as a colorless oil. []D17 +10.1 (*c* 1.0, CHCl3); FT-IR (neat)  3469, 2929, 2858, 1741, 1444, 1373, 1281, 1200, 1130, 1084, 970, 760 cm-1; 1H NMR (300 MHz, CDCl3)  5.44 (dt, J = 14.4, 5.4Hz, 1H), 5.42 (dt, J = 14.1, 5.1Hz, 1H) 3.92 (s, 4H) 3.87 (dt, *J* = 3.0, 6.3Hz, 1H), 3.79 (s, 3H), 3.13 (d, *J =* 6.0, 1H), 2.99 (d, *J =* 5.7, 1H), 2.39 (d, *J* = 6.9Hz, 1H), 2.29-2.06 (m, 2H), 1.91 (q, *J =* 6.3, 2H), 1.82-1.70 (m, 1H), 1.61-1.56 (m, 5H), 1.29-1.22 (m, 16H), 0.88 (t, *J =* 6.9Hz, 3H ) ppm; 13C NMR (75 MHz, CDCl3)  170.1, 131.4, 128.9, 69.3, 64.9, 58.2, 52.6, 49.9, 37.1, 32.9, 32.6, 31.8, 29.8, 29.6, 29.4, 29.1, 28.5, 23.8, 22.6, 14.1 ppm; HRMS (EI) calcd for C24H42O6: 426.2981, found: 426.2984.

(2*R*, 3*R*, *E*)-1,2-epoxy-13-(2’-Hexyl-[1,3]dioxolan-2’-yl)-3-hydroxy-2-hydroxymethyl-tridec-1,6-diene (12)

To a solution of ester **11** (1.02 g, 2.39 mmol) in THF (12 mL) and MeOH (12 mL) was added NaBH4 (540 mg, 14.4 mmol) at 0°C. After 4 hr, the reaction was quenched with saturated aqueous NaHCO3 and extracted with AcOEt. The Organic layer was washed with brine, dried, and concentrated. The residue was purified by flush chromatography {silica gel, AcOEt-hexane (1:3)} to afford diol **12** (0.75 g, 79%) as a colorless oil. []D21 +9.68 (*c* 0.95, MeOH); FT-IR (neat)  3438, 2929, 2858, 1460, 1207, 1049, 968, 727 cm-1; 1H NMR (300 MHz, CDCl3)  5.43 (dt, J =13.5, 3.9Hz, 1H), 5.42 (dt, J =13.2, 3.9Hz, 1H), 3.93 (s, 4H), 3.86 (t, *J* = 6.3Hz, 1H), 3.85 (dd, *J* = 7.2, 12.3Hz, 1H), 3.74 (dd, *J* = 7.2, 12.3Hz, 1H), 2.95 (dt, *J* = 4.5Hz, 1H), 2.87 (dt, *J* = 4.5Hz, 1H), 2.24-2.07 (m, 2H), 2.17 (br, 1H), 1.98 (q, *J* = 6.0, 2H), 1.77-1.45 (m, 6H), 1.33-1.22 (m, 16H), 0.88 (t, *J =* 6.9Hz, 3H ) ppm; 13C NMR (75 MHz, CDCl3)  131.6, 129.2, 112.0, 68.4, 64.9, 61.9, 61.8, 47.8, 37.2, 32.8, 32.6, 31.9, 29.8, 29.7, 29.4, 29.1, 28.6, 23.9, 23.9, 22.7, 14.2 ppm; HRMS (EI) calcd for C23H42O5: 398.3032, found: 398.3067.

(2*S*, 3*R*, *E*)-1,2-epoxy-13-(2’-Hexyl-[1,3]dioxolan-2’-yl)-3-hydroxy-2-*tert*-butyldiphenylsiloxy-methyl-tridec-1,6-diene (13)

To a solution of diol **12** (220 mg, 0.55 mmol) and Et3N (92 L, 0.66 mmol) in CH2Cl2 (3 mL) was added TBDPSCl (0.18 mL, 0.66 mmol) and DMAP (3.4 mg, 27 mol) at 0 °C. After 18 hr, the reaction mixture was quenched with saturated aqueous NH4Cl, and diluted with Et2O. The Organic layer was washed with brine, dried, and concentrated. The residue was purified by column chromatography {silica gel, AcOEt-hexane (1:10)} to give **13** (334 mg, 95%) as a colorless oil. []D18 –2.61 (*c* 1.0, MeOH); FT-IR (neat)  3482, 2929, 2860, 1747, 1464, 1103 cm-1; 1H NMR (300 MHz, CDCl3)  7.68-7.65 (m, 4H), 7.45-7.36 (m, 6H), 5.43 (dt, J =12.0, 3.0Hz, 1H), 5.41 (dt, J =12.0, 2.7Hz, 1H), 3.99 (dt, *J* = 9.3, 6.0Hz, 1H), 3.92 (s, 4H), 3.88 (d, *J* = 11.7Hz, 1H), 3.72 (d, *J* = 11.4Hz, 1H), 2.87 (d, *J* = 4.5Hz, 1H), 2.66 (d, *J* = 4.5, 1H), 2.26-2.04 (m, 2H), 2.18 (d, *J* = 2.7Hz, 1H), 1.96 (q, *J* = 6.0Hz, 2H), 1.72-1.20 (m, 22H), 1.06 (s, 9H), 0.88 (t, *J =* 6.3Hz, 3H ) ppm; 13C NMR (75 MHz, CDCl3)  135.7, 135.7, 132.9, 132.8, 131.3, 130.0, 129.9, 129.3, 127.9, 112.0, 68.0, 65.0, 64.8, 61.7, 47.6, 37.2, 32.9, 32.7, 31.9, 29.9, 29.7, 29.6, 29.2, 28.8, 26.8, 23.9, 22.7, 19.3, 14.2 ppm; HRMS (EI) calcd for C39H60O5Si (M+ - *t*Bu): 579.3506, found:579.3499

(2*R*, 3*R*, *E*)-1,2-epoxy-13-(2’-Hexyl-[1,3]dioxolan-2’-yl)-3-trichloroacetimidyloxy-2-*tert*-butyldiphenylsiloxymethyl-tridec-1,6-diene (14)

To an ice-cold suspension of epoxyalcohol **13** (298 mg, 0.47 mmol), Cl3CCN (0.15 mL, 0.85 mmol), and 4A molecular sieves (powdered and activated, 300 mg) in CH2Cl2 (4 mL) was added DBU (84 L, 0.56 mmol), and the mixture was stirred for 10 hr. The reaction mixture was filtered through a pad of Celite, and the filtrate was concentrated. The residue was purified by flush chromatography {silica gel, AcOEt-hexane (1:10)} to afford epoxytrichloroacetimidate **14** (295 mg, 81%) as a colorless oil.[]D22 +7.30 (*c* 1.00, CHCl3); FT-IR (neat)  3772, 3652.52, 3545, 3340, 2929, 2858, 2102, 1666, 1435, 1105, 798 cm-1; 1H NMR (300 MHz, CDCl3)  8.37 (s, 1H), 7.70-7.66 (m, 4H), 7.44-7.36 (m, 6H), 5.40-5.35 (m, 2H), 5.20 (t, *J* = 6.6Hz, 1H), 3.92 (s, 4H) 4.01 (d, *J* = 11.7Hz, 1H), 3.77 (d, *J* = 11.7Hz, 1H), 2.90 (d, *J* = 5.1Hz, 1H), 2.83 (d, *J* = 5.1, 1H), 2.17-2.01 (m, 2H), 2.01-1.94 (m, 2H), 1.88 (dt, *J* = 6.6, 7.8Hz, 2H), 1.61-1.57 (m, 6H), 1.33-1.20 (m, 14H), 1.05 (s, 9H), 0.88 (t, *J =* 6.9Hz, 3H ) ppm; 13C NMR (75 MHz, CDCl3)  162.0, 135.8, 135.7, 133.0, 131.8, 130.0, 129.9, 129.8, 128.5, 127.8, 111.9, 77.0, 64.9, 62.8, 59.4, 48.9, 37.2, 32.6, 31.9, 30.8, 29.9, 29.8, 29.5, 29.2, 28.6, 26.8, 23.9, 22.7, 19.3, 14.2 ppm.

**(*4S, 5R, E*)-{4-*tert*-Butyldiphenylsiloxymethyl-5-[10’-(2”-hexyl-[1,3]dioxolan-2”-yl)-dec-3-enyl]-2-trichloromethyl-4,5-dihydro-oxazol-4-yl}-methanol (15)**

**5-(tert-Butyl-diphenyl-silanyloxymethyl)-6-[10-(2-hexyl-[1,3]dioxolan-2-yl)-dec-3-enyl]-2-trichloromethyl-5,6-dihydro-4*H*-[1,3]oxazin-5-ol (16)**

To a solution of epoxytrichloroacetimidate **14** (800 mg, 1.02 mmol) inCH2Cl2 was added BF3·OEt2 (0.12 mL, 1.02 mmol) at –23 °C. After 4 hr, the reaction mixture was quenched with Et3N (0.6 mmL, 4.3 mmol) and allowed to warm to room temperature. The mixture was diluted with AcOEt, washed with H2O and brine, dried, and concentrated. The residue was purified by flush chromatography {silica gel, AcOEt-hexane (1:20)} to give oxazoline **15** (569 mg, 71%) as a colorless oil, and dihydrooxazine **16** (30.3 mg, 4%) as a colorless oil.

Data for oxazoline **15**: []D23 –3.5 (*c* 1.00, CHCl3); FT-IR (neat)  3753, 3396, 3062, 2929, 2860, 1765, 1657, 1464, 1236, 1107, 823 cm-1; 1H NMR (300 MHz, CDCl3)  7.67-7.64 (m 4H) 7.47-7.35 (m, 6H) 5.45 (dt, J = 15.0, 5.4Hz, 1H), 5.43 (dt, J = 14.4, 6.0), 4.89 (dt, *J* = 3.3, 9.9Hz, 2H), 3.92 (s, 4H), 3.79 (d, *J* = 6.1Hz, 2H), 3.73 (d, *J* = 16.6Hz, 2H), 2.38 (t, *J =* 7.2Hz, 1H), 2.28 (dt, *J =* 4.8, 9.0Hz, 1H), 2.21-2.08 (m, 2H), 2.05-1.90 (m, 4H), 1.69 (br d, *J =* 2.7, 1H), 1.59-1.56 (m, 4H), 1.30-1.22 (m, 14H), 1.06 (s, 9H), 0.88 (t, *J =* 6.9Hz, 3H), 0.88 (t, *J =* 6.9Hz, 3H ) ppm; 13C NMR (75 MHz, CDCl3)  163.5, 135.8, 132.5, 131.9, 130.1, 130.0, 128.5, 127.9, 112.1, 76.8, 66.1, 65.0, 63.9, 37.2, 32.7, 31.9, 29.9, 29.7, 29.6, 29.5, 29.2, 27.0, 24.0, 22.7, 19.2, 14.2; MS (FAB):782 (M+).

Data for dihydrooxazine **16**: []D24 +10.7 (*c* 1.37, CHCl3); FT-IR (neat)  3438, 2931, 2860, 1722, 1684, 1462, 1281, 1219, 1107, 960, 796 cm-1; 1H NMR (300 MHz, CDCl3)  7.72-7.61 (m 4H) 7.55-7.38 (m, 6H) 5.46 (dt, *J* = 6.6, 15.0Hz, 2H), 5.33 (dt, *J* = 6.6, 15.0Hz, 2H), 4.33 (d, *J* = 9.6Hz, 1H), 3.92 (s, 4H), 3.60 (dd, *J* = 10.2, 16.5Hz, 2H), 3.53 (s, 2H), 2.38 (t, *J =* 7.2Hz, 1H), 2.35-2.26 (m, 1H), 2.16 (dt, *J* = 6.9, 15.0Hz, 1H), 1.96 (q, *J =* 6.6, 2H), 1.62-1.50 (m, 8H), 1.35-1.20 (m, 14H), 1.08 (s, 9H), 0.88 (t, *J =* 6.9Hz, 3H), 0.88 (t, *J =* 6.9Hz, 3H ) ; 13C NMR (75 MHz, CDCl3)  163.5, 135.8, 132.5, 131.9, 130.1, 130.0, 128.5, 128.2, 127.9, 112.0, 88.1, 76.8, 66.1, 65.0, 63.9, 37.2, 32.7, 31.9, 29.9, 29.7, 29.6, 29.5, 29.2, 27.0, 23.9, 22.7, 19.2, 14.2; HRMS (EI) calcd for C41H60O5Cl3NSi: 779.3306, found: 779.3245.

**(2*S*, 3*R*, *E*)-13-(2’-Hexyl-[1,3]dioxolan-2’-yl)-2-(*tert*-butyldiphenylsiloxy)methyl-3-hydroxy-2-trichloroacetamido-tridec-6-enoic acid methyl ester** **(17)**

To a solution of **15** (51.0 mg, 65.3 mol) in benzene (0.7 mL) and DMSO (0.1 mL) was treated with DCC (43.5 mg, 0.21 mmol), pyridine ( L), and trifluoroacetic acid (3 L). The mixture was stirred overnight at room temperature, and then diluted with *n*-hexane, and filtered through a pad of Celite. The filtrate was concentrated to give the crude aldehyde (60 mg), which was used directly for the next step without purification. The crude aldehyde (60 mg) was dissolved in a mixed solvent of t-BuOH-H2O (4 :1 v/v, 0.7 mL) and 2-methyl-2-butene (39 L). To this solution was added NaH2PO4 (18.4 mg, 91 mol), and the mixture was treated with sodium chlorite (80% purity, 23.7 mg, 0.21 mmol). The biphasic mixture was stirred vigorously at room temperature for 1 hr. The reaction mixture was diluted with CH2Cl2, and washed with 0.3N HCl and brine, dried, and concentrated. The residue was dissolved in THF and treated with ethereal CH2N2 at 0 °C, and then concentrated. The residue was purified by preparative thin layer chromatography {0.5 mm, AcOEt-hexane (1:5)} to give **17** (29.6 mg, 55% for 3 steps) as a colorless oil. []D24.6 (*c* 1.0, CHCl3); FT-IR (neat)  3489, 3372, 3053, 2937, 2560, 1747, 1720, 1587, 1506, 1379, 1240, 1109, 972, 920, 744 cm-1; 1H NMR (300 MHz, CDCl3)  8.03 (s 1H) 7.63-7.55(m, 4H), 7.50-7.35(m, 6H), 5.41 (dt, *J* = 6.6, 15.3Hz, 1H), 5.29 (dt, *J* = 6.3, 15.0Hz, 1H), 4.23 (d, *J* = 10.5Hz, 1H), 4.08 (d, *J* = 10.5Hz, 1H), 3.92 (s, 4H), 3.82 (t, *J* = 6.0Hz, 2H), 3.73 (s, 1H), 2.37 (dt, *J* = 2.1, 7.2Hz, 1H), 2.27 (sext, *J* = 7.2Hz, 1H), 2.05 (dt, *J =* 7.2, 10.5, 1H), 1.93 (q, *J =* 6.6, 2H), 1.61-1.56 (m, 8H), 1.68(m, 14H), 1.05(s,9H), 0.88 (t, *J =* 6.9Hz, 3H); 13C NMR (75 MHz, CDCl3)  169.7, 162.2, 135.6, 135.5, 132.1, 131.9, 131.7, 130.3, 128.7, 128.1, 112.0, 72.5, 70.0, 65.0, 64.4, 53.1, 37.2, 32.7, 32.6, 31.9, 29.9, 29.7, 29.5, 29.2, 29.0, 28.9, 26.8, 23.9, 22.7, 19.2, 14.2; MS (FAB) 826 (M+):.

***N*-trichloroacety mycestericin E methyl ester(18)**

To a solution of **17** (18.0 mg, 21.8 mol) in MeCN (1.5 mL) in a polypropylene tube was added 47% aqueous HF, and the mixture was heated at 60°C for 20 hr. After cooling, the mixture was diluted with CHCl3 and washed with aqueous saturated NaHCO3 and brine, dried, and concentrated. The residue was purified by flush chromatography (silica gel, 1% MeOH-CHCl3) to afford **18** (10.6 mg, 92%) as a colorless oil. []D24 +12.3° (*c* 1.13, CHCl3); FT-IR (neat)  3370, 2925, 2856, 1747, 1711, 1516, 1230, 1043, 823 cm-1; 1H NMR (300 MHz, CDCl3)  7.88 (s 1H) 5.47 (dt, *J* = 6.3, 15.3Hz, 1H), 5.39 (dt, *J* = 6.3, 15.6Hz, 1H), 4.12 (d, *J* = 12.0Hz, 1H), 4.09 (d, *J* = 6.9Hz, 1H), 3.37 (br,1H), 3.12 (d, *J* = 7.8Hz, 2H), 2.39 (t, *J =* 7.2Hz, 4H), 2.26 (dt, *J* = 6.9, 14.4Hz, 1H), 2.13 (dt, *J* = 7.2, 14.1Hz, 1H), 1.98 (q, *J =* 6.6, 2H), 1.53 (quint, *J =* 7.2, 4H), 1.34-1.26 (m, 14H), 0.88 (t, *J =* 6.9Hz, 3H)p; 13C NMR (75 MHz, CDCl3)  212.4, 170.1, 162.6, 132.2, 128.3, 92.5, 73.1, 69.8, 63.0, 53.3, 42.9, 42.8, 32.5, 31.6, 29.2, 29.1, 29.0, 28.9, 28.8, 23.9, 22.5, 14.1; MS (FAB):545 (M+).

**(-)-Mycestericin E (1)**

A mixture of **18** (10.6 mg, 20.0 mol), 10% aqueous NaOH (1.0 mL), and MeOH (1.0 mL) was heated at 80 °C for 3 hr. After cooling, the mixture was treated with ion exchanging resin (Amberlite IRC-76, COOH form, 10 mL), and the mixture was filtered through a glass filter. The resin was extensively washed with MeOH. The combined filtrate was concentrated and the residue was purified by reverse-phase silica gel chromatography {Cosmosil 140-C18PREP, MeCN-H2O (7:3)} to afford mycestericin E (**1**) (5.4 mg, 70%) as a white powder.

mp 183-184 °C , []D27 –8.33 (*c* 0.05, MeOH); {lit3. mp 184-186 °C, []D –8.6° (c 0.06, MeOH)}; FT-IR (neat)  3354, 2925, 2852, 1709, 1593, 1464, 1053, 966, 829, 721 cm-1; 1H NMR (500 MHz, MeOH)  5.46 (dt, *J* = 6.0, 15.0Hz, 1H), 5.43 (dt, *J* = 6.0, 15.5Hz, 1H), 3.92 (d, *J* = 11.5Hz, 1H), 3.85 (dd, *J* = 1.5, 11.5Hz, 4H), 3.80 (d, *J* = 11.5Hz, 1H), 2.43 (t, *J* = 7.0Hz, 4H), 2.26 (m, 1H), 2.04 (m, 1H), 1.97 (q, *J =* 6.5, 2H), 1.69 (m, 1H), 1.53 (m, 4H), 1.40 (m, 2H), 1.37-1.25 (m, 8H), 0.88 (t, *J =* 7.0Hz, 3H); 13C NMR (75 MHz, CDCl3)  214.4, 132.2, 130.5, 71.7, 62.5, 43.5, 33.6, 32.8, 32.7, 30.8, 30.6, 30.5, 30.1, 30.0, 224.9, 23.6, 14.4 .

**References**

1. Y. Iwabuchi, M. Nakatani, N. Yokoyama, S. Hatakeyama, *J. Am. Chem. Soc*.,1999, **121**, 10219.
2. D. A. Evans, L. K. Truesdale, K. G. Grimm, S. L. Nesbitt, *J. Am. Chem. Soc*.,1977, **99**, 5009.
3. S. Sasaki, R. Hashimoto, M. Kikuchi, K. Inoue, T. Ikumoto, R. Hirose, K. Chiba, Y. Hoshino, T. Okamoto, T. Fujita, *J. Antibiot*., 1994, **47**, 420.
